# Supplementary material for: Origins of Mesoscale Mixed Layer Depth Variability in the Southern Ocean
Source: Copernicus journal article supplement (doi:10.5194/egusphere-2022-1516), 2023-01-19
Supplement: Supplementary file [file egusphere-2022-1516-AC1-supplement.zip]

## Reply to Review of “Origins of Mesoscale Mixed Layer Depth Variability in the Southern Ocean”

We would like to thank the reviewer for their thoughtful comments on our paper.

Major comments:

1. Although not considered in this manuscript, the stratification below the mixed layer can also influence MLD variability. This effect could also be discussed.

•-Thank you for your thoughtful comments on our paper. We agree that considering the stratification below the mixed layer is crucial for identifying the key processes that contribute to the seasonal variability in MLD. We appreciate your feedback on our discussion of the monthly depth-dependent buoyancy budget at the depth-latitude cross section taken at  $X = 2000$  km in the zonal direction includes a brief analysis of the stratification below the mixed layer. We agree that considering the stratification below the mixed layer is crucial for identifying the key processes that contribute to the seasonal variability in MLD. For example, our analysis indicates that from January to March, the re-stratifying signal at the base of the mixed layer indicates that the water column is becoming more stable during the warm months (see Fig. 3 and 4, lines 155-165).

2) Although the authors did not distinguish them, cyclonic and anticyclonic eddies may contribute differently. Not only do they have different impacts on oceanic stratification, which is pointed out in the above comment, they have different impacts on the overlying atmosphere. The authors may find a paper by Gaube et al. (2015) useful.

Gaube et al. (2015) Satellite Observations of Mesoscale Eddy-Induced Ekman Pumping. J. Phys. Oceanogr., 45, 104–132.

- Here we use “eddy” and “mesoscale anomalies” interchangeably, but “eddies” in our definition don’t solely mean coherent vortices, but also include fronts, waves and jets. We agree that it is important to clarify that in our analysis, “eddy” refers not only to coherent vortices but also to all mesoscale processes that the filter can smooth out.

We now clarify it at lines 145-150. “We use the term “eddies” for all deviations from the large-scale state, and this definition includes linear and nonlinear wave-like anomalies, coherent vortices and large-scale transients.

Our more generic definition of eddies is arguably more relevant to the task of parameterization of subgrid motions in numerical models but makes it difficult to distinguish cyclones and anticyclones. Such classification would be impossible in the case of, for example, mesoscale fronts or nonlinear waves. Regarding the contribution of cyclonic and anticyclonic eddies to Ekman upwelling and downwelling, respectively, we appreciate the reference to Gaube et al. (2015), which highlights the importance of distinguishing between these two types of eddies. However, our focus in this study is on the statistical characteristics and parameterization of ocean eddies, rather than on the separation of cyclonic and anticyclonic eddies.

3) Section 3.1: I think buoyancy budget analyses alone cannot isolate effects of ocean eddies. **Ekman currents** can also contribute to the buoyancy advection term. Thus, at this stage, the authors have not shown that “buoyancy advection by ocean eddies can have both re-stratifying and destratifying effects, whereas some previous studies only account for their overall re-stratifying effect” (Lines 185-187). I recommend the authors to support this statement with more evidence.

- Thank you for your comments on the role of Ekman advection in our study. While we did not attempt to separate Ekman advection from other advection processes, we agree that it is an important consideration in understanding the dynamics of oceanic eddies. The advection term in our analysis is due to the total velocity and is composed of two parts: the locally forced Ekman advection driven by the wind, and the geostrophic and ageostrophic processes that exhibit strong mesoscale variability. We expect the ageostrophic variability to be much weaker than the geostrophic part since the Rossby numbers in both the SC and WC domain are much smaller than 1.

The Ekman current, as part of the advection, is expected to play a role in regions with strong wind variability and SST gradients. While we did not specifically discuss the role of Ekman heat advection in our study, we appreciate the reference to Gao et al. (2022) and will review this paper for further insight.

4) The 300 km x 300 km box-car averaging not only smooth out meso-scale eddy variability, but also frontal-scale variability.

- Thank you for your comment regarding mesoscale variability and our use of the terms "eddy" and "mesoscale" interchangeably. We agree that the mesoscale variability in this study indeed includes frontal-scale variability, and that the term "eddy" encompasses not only coherent vortices but also all mesoscale processes that can be smoothed out by the filter.

To clarify, in our study we use the term "eddy" to refer to all mesoscale processes, including frontal-scale variability, which are filtered out in our analysis. We appreciate your input and will make sure to clarify this terminology in the revised manuscript.

We now explain this at lines 145-150: "We use the term "eddies" for all deviations from the large-scale state, and this definition includes linear and nonlinear wave-like anomalies, coherent vortices and large-scale transients. "

5) Smooth-Winds experiment: The statement "anomalies in wind speed can modulate air-sea heat exchanges" in Lines 212-213 made me wonder whether turbulent heat fluxes that are a function of wind speed are also modified in the Smooth-Winds experiment. If so, this experiment cannot isolate effects of mesoscale wind stress.

- We agree that turbulent heat fluxes are a function of wind speed, but in our Smooth-Winds experiment, we specifically focused on the effect of mesoscale wind stress by smoothing wind stress instead of wind speed. Although it was explained on ll.110 of the original manuscript, we agree that the name "Smooth\_Winds" can be misleading. In the revised manuscript, we changed the names of two experiments to clarify the naming of our experiments, we agree that using "Smooth-heat-flux" and "Smooth-momentum-flux" instead of "Smooth-fluxes" and "Smooth-winds" would more accurately reflect the focus of our analysis.

Here we can use an example of an oil spill on the sea surface as a useful analogy to explain the concept of decorrelation between wind stress and wind speed. When oil spill happens on sea surface, wind speed stays the same while wind stress became very low because of low drag coefficient. This is how decorrelation happens between wind stress and wind speed.

Even if wind speed remains constant, a change in the drag coefficient can result in a decrease in wind stress and therefore affect turbulent heat fluxes.

6) In Figs. 7-9, the authors are showing time-series for a single year, but because of large-amplitude high-frequency variability, it may obscure seasonal variations in some cases.

•We agree that the high-frequency variability shown in Figs. 7-9 may make it difficult to discern seasonal variations in some months. However, our goal in showing these time-series was to

illustrate the variability and trends in the data over the entire time period. Most of the seasonal variations happens in fall/winter when mixed layer deepens.

Minor comments:

1.Lines 2-3: In this sentence, “mesoscale” appears twice and seems redundant. I recommend removing one of them.

- We removed “at the oceanic mesoscale”.

2) Lines 89-91: Since the authors are just showing simulated fields in Figs. 1a-c, the authors cannot simply write “in general agreement with observed values”. The authors had better state **in what ways** these simulated fields are generally in agreement with observations.

- The simulated fields generally agree with the observed climatological fields. We have revised the description of Figure 1, as indicated in lines 90-93. The reader is referred to Perlin et al. (2021) and Gao et al. (2020), which are based on the same model, for a comparison of model simulated with observations.

3) Line 99: To be more specific, replace “forcing” with “lateral boundary conditions”.

- We replaced “forcing” with “lateral boundary conditions”.

4) Lines 110-115: Since “q” is defined as the shortwave radiation in Eq. (2), it is not appropriate to use “q” in Eq. (3).

- We changed q to “Q” in Eq. (3).

5) Line 125: Add “dz” at the end of the left hand side of Eq. (6).

- Added “dz” to Eq. (6) on lhs.

6) Figure 1: Considering that the horizontal resolution of the ocean model is 2.5 km, the unit for the west-east distance in the horizontal axis and the north-south distance in the vertical axis cannot be km.

- The distance is fixed in figure 1. The distance was divided by 1000 by mistake. Please see attached “fig01.png”

7) Figures 2 and 3 caption: Why are the authors showing these six months with different intervals between them? Unless there is a clear reason, it is better to plot either odd or even months. Also, replace “a-c)” with “(a), (d), (g)”, “d-f)” with “(b), (e), (h)”, and “g-i)” with “(c), (f), (i)”.

- These months were selected because they most clearly show the seasonal progression more clearly. The caption is fixed.

8) Figure 4: “January and March, 2016” in its figure caption is inconsistent with months in the title of each panel.

- It should beWe changed it to “March, June, and September, 2016”

9) Figures 5, 7, and 8: It is better to use black (or some other colors) lines instead of green lines for the Control experiment.

- We changed the green lines to black in Fig. 5, 7 and 8.

10) Figure 5a: Are the authors showing downward sea surface heat-flux anomalies as indicated in the figure caption or turbulent heat flux anomalies as written in the main text in Lines 200-207?

- We are showing turbulent heat flux anomalies. The caption is fixed.

11) Figure 6: Since figures should be labeled in the order of appearance, Fig. 6 should be labeled Fig. 2, because the figure is cited in Line 144 after Fig. 1.

- Figure.6 is now labeled Fig.2.

12) technical corrections

Line 70: Replace “dampen” with “damp”.

- Corrected

Line 77: Add “by” after “detail”.

- Corrected

Line 89: Replace “Figure.” with “Fig.”.

•Corrected

Line 94: Add “components” after “radiative”.

•Corrected

Line 96: Replace “simulations” with “experiments”

•Corrected

Line 98: Replace “Eddy Kinetic Energy” with “eddy kinetic energy”.

•Corrected

Line 98: Replace “ran” with “run”, because the past participle of “run” is “run”.

•Corrected

Line 104: Delete one of the “Li and Lee”.

•Corrected

Line 110: Replace “flux” with “radiation”.

•Corrected

Line 111: Add “and” before “q”.

•Corrected

Line 114: Replace “heat flux” after “shortwave” and “longwave” with “radiation”.  
•Corrected

Line 115: Add “turbulent” before “latent”.  
•Corrected

Line 137: Replace “Li and Lee (2017)” with “(Li and Lee 2017)”.  
•Corrected

Line 169: Replace “in” with “of”.  
•Corrected

Line 178: Add “terms” after “residual”.  
•Corrected

Line 204: Replace “dampen” with “damp”.  
•Corrected

Figure 1 caption, Line 1: Delete one of the two “on”.  
•Corrected

Figure 7 caption, lines 2 and 3: Replace “experiment” with “experiments”.  
•  
•
